# Supplementary material for: Improving the Intercellular Uptake and Osteogenic Potency of Calcium Phosphate via Nanocomplexation with the RALA Peptide
Source: MDPI journal article supplement (doi:10.3390/nano10122442), 2020-12-07
Supplement: s1 [file s1]

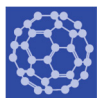

## Supplementary Materials

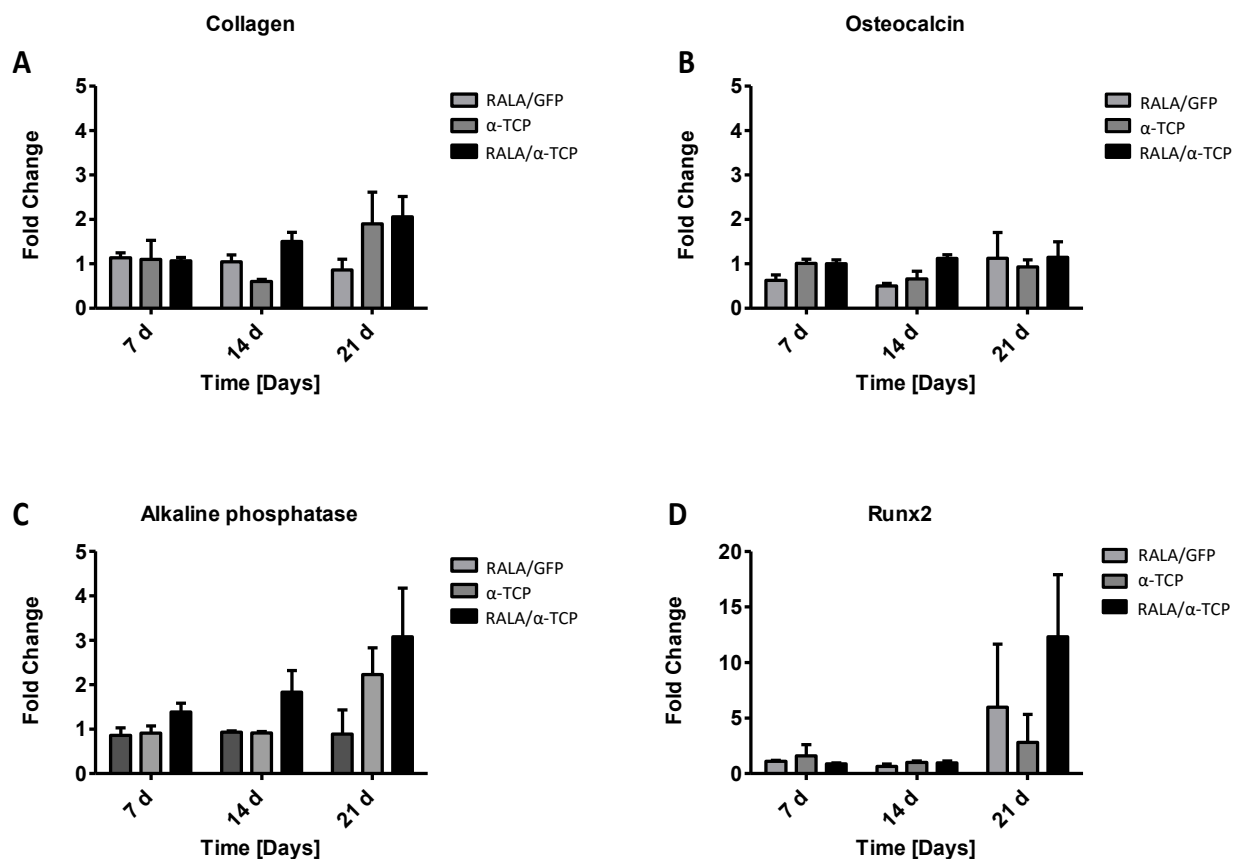

**Supplementary Figure 1. Osteogenesis-related gene expression by real-time PCR.** The average mRNA levels of the RT-PCR products of osteogenic genes: collagen I, osteocalcin, alkaline phosphatase and Runx2, expressed by MG-63 cells cultured up to 21 d post-transfection with RALA/ $\alpha$ -TCP NPs in a 24-well plate. Expression was normalised to untreated control MG-63 cells, using GAPDH as the reference, and the relative gene expression was determined by using REST software (Qiagen, UK). (N = 3  $\pm$  SEM). Control vs RALA/ $\alpha$ -TCP  $p > 0.05$  for all genes, across all time points.
